# Supplementary material for: Downregulation of ATP6V1A Involved in Alzheimer’s Disease via Synaptic Vesicle Cycle, Phagosome, and Oxidative Phosphorylation
Source: Hindawi journal article supplement (doi:10.1155/2021/5555634), 2021-01-01

A

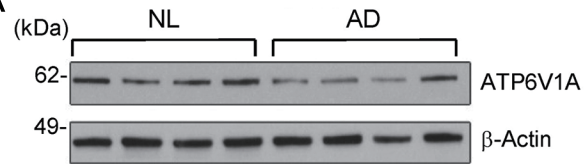

B

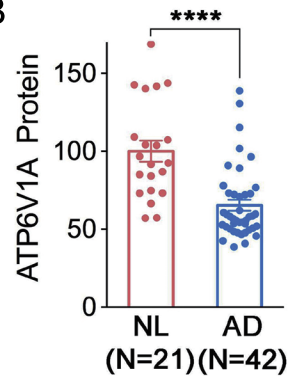

C

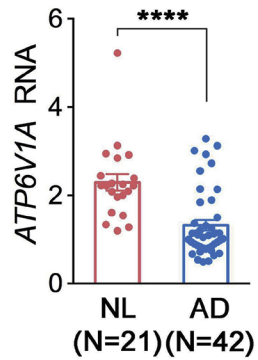

D

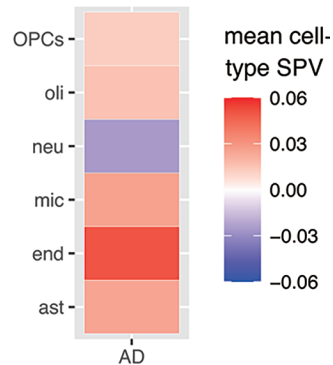

E

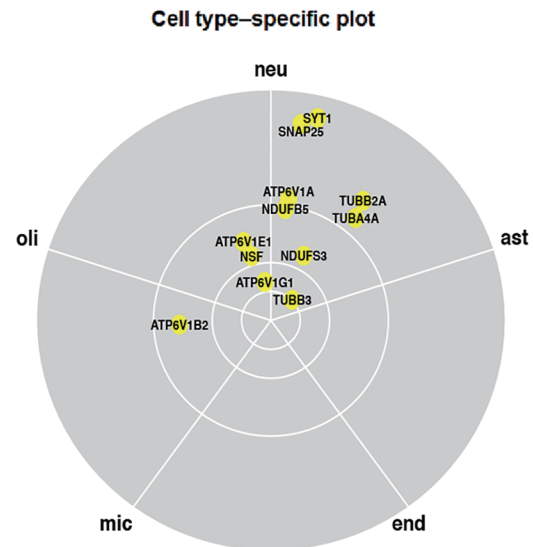

Supplement: f2 [file 5555634.f2.pdf]
